# Supplementary material for: Neither slim nor fat: estimating the mass of the dodo (Raphus cucullatus, Aves, Columbiformes) based on the largest sample of dodo bones to date
Source: PeerJ. 2017 Dec 5;5:e4110. doi: 10.7717/peerj.4110 (PMC5721909; doi:10.7717/peerj.4110)
Supplement: Supplemental Information 1 — Raw circumference measurements on 174 dodo femora, as well as mass estimates based on various regressions. Details to abbreviations can be found in the “legend” tab. [file peerj-05-4110-s001.xlsx]

## Sheet: Supplementary Information 1
Institution Code	Catalogue Number	side	M_C	own.naive	own.smear	own.wo.columbids.naive	own.wo.columbids.smear	own.naive.flightless	own.naive.flightless.ratio	CM.all.naive	CM.subset.naive	Field.all.naive	Field.all.smear
NHM	NHM(no catalogue number)	l	58	14.0149	14.5663	13.7136	14.051	26.3027	27.906	16.8005	12.8663	15.0068	16.2031
MMC	2000.04.102	l	58	14.0149	14.5663	13.7136	14.051	26.3027	27.906	16.8005	12.8663	15.0068	16.2031
MMC	2000.04.106	l	58	14.0149	14.5663	13.7136	14.051	26.3027	27.906	16.8005	12.8663	15.0068	16.2031
MMC	2000.04.110	l	61	15.8319	16.4548	15.4995	15.8808	30.516	32.3761	19.0225	14.4254	16.9344	18.2843
MMC	2000.04.114	l	57	13.4379	13.9666	13.1467	13.4701	24.9889	26.5122	16.0961	12.3687	14.3943	15.5418
MMC	2000.04.115	l	59	14.6062	15.1808	14.2947	14.6463	27.6613	29.3475	17.523	13.375	15.6343	16.8806
MMC	2000.04.117	l	57	13.4379	13.9666	13.1467	13.4701	24.9889	26.5122	16.0961	12.3687	14.3943	15.5418
MMC	2000.04.119	l	55	12.3264	12.8113	12.0548	12.3514	22.4929	23.864	14.7405	11.4062	13.2136	14.2669
MMC	2000.04.12	l	58	14.0149	14.5663	13.7136	14.051	26.3027	27.906	16.8005	12.8663	15.0068	16.2031
MMC	2000.04.121	l	59	14.6062	15.1808	14.2947	14.6463	27.6613	29.3475	17.523	13.375	15.6343	16.8806
MMC	2000.04.13	l	61	15.8319	16.4548	15.4995	15.8808	30.516	32.3761	19.0225	14.4254	16.9344	18.2843
MMC	2000.04.14	l	58	14.0149	14.5663	13.7136	14.051	26.3027	27.906	16.8005	12.8663	15.0068	16.2031
MMC	2000.04.15	l	54	11.7916	12.2555	11.5297	11.8133	21.3093	22.6082	14.0892	10.9413	12.6452	13.6532
MMC	2000.04.16	l	54	11.7916	12.2555	11.5297	11.8133	21.3093	22.6082	14.0892	10.9413	12.6452	13.6532
MMC	2000.04.19	l	58	14.0149	14.5663	13.7136	14.051	26.3027	27.906	16.8005	12.8663	15.0068	16.2031
MMC	2000.04.21	l	55	12.3264	12.8113	12.0548	12.3514	22.4929	23.864	14.7405	11.4062	13.2136	14.2669
MMC	2000.04.23	l	57	13.4379	13.9666	13.1467	13.4701	24.9889	26.5122	16.0961	12.3687	14.3943	15.5418
MMC	2000.04.25	l	57	13.4379	13.9666	13.1467	13.4701	24.9889	26.5122	16.0961	12.3687	14.3943	15.5418
MMC	2000.04.27	l	54	11.7916	12.2555	11.5297	11.8133	21.3093	22.6082	14.0892	10.9413	12.6452	13.6532
MMC	2000.04.29	l	57	13.4379	13.9666	13.1467	13.4701	24.9889	26.5122	16.0961	12.3687	14.3943	15.5418
MMC	2000.04.30	l	57	13.4379	13.9666	13.1467	13.4701	24.9889	26.5122	16.0961	12.3687	14.3943	15.5418
MMC	2000.04.32	l	57	13.4379	13.9666	13.1467	13.4701	24.9889	26.5122	16.0961	12.3687	14.3943	15.5418
MMC	2000.04.36	l	62	16.4666	17.1145	16.1236	16.5202	32.0135	33.9649	19.7998	14.9673	17.6072	19.0108
MMC	2000.04.37	l	55	12.3264	12.8113	12.0548	12.3514	22.4929	23.864	14.7405	11.4062	13.2136	14.2669
MMC	2000.04.38	l	56	12.8751	13.3816	12.5938	12.9036	23.7193	25.1651	15.4094	11.882	13.7966	14.8964
MMC	2000.04.42	l	54	11.7916	12.2555	11.5297	11.8133	21.3093	22.6082	14.0892	10.9413	12.6452	13.6532
MMC	2000.04.44	l	61	15.8319	16.4548	15.4995	15.8808	30.516	32.3761	19.0225	14.4254	16.9344	18.2843
MMC	2000.04.45	l	58	14.0149	14.5663	13.7136	14.051	26.3027	27.906	16.8005	12.8663	15.0068	16.2031
MMC	2000.04.47	l	58	14.0149	14.5663	13.7136	14.051	26.3027	27.906	16.8005	12.8663	15.0068	16.2031
MMC	2000.04.48	l	57	13.4379	13.9666	13.1467	13.4701	24.9889	26.5122	16.0961	12.3687	14.3943	15.5418
MMC	2000.04.51	l	54	11.7916	12.2555	11.5297	11.8133	21.3093	22.6082	14.0892	10.9413	12.6452	13.6532
MMC	2000.04.56	l	59	14.6062	15.1808	14.2947	14.6463	27.6613	29.3475	17.523	13.375	15.6343	16.8806
MMC	2000.04.57	l	62	16.4666	17.1145	16.1236	16.5202	32.0135	33.9649	19.7998	14.9673	17.6072	19.0108
MMC	2000.04.59	l	58	14.0149	14.5663	13.7136	14.051	26.3027	27.906	16.8005	12.8663	15.0068	16.2031
MMC	2000.04.6	l	60	15.2118	15.8103	14.8899	15.2562	29.0655	30.8372	18.2636	13.8946	16.2768	17.5743
MMC	2000.04.66	l	56	12.8751	13.3816	12.5938	12.9036	23.7193	25.1651	15.4094	11.882	13.7966	14.8964
MMC	2000.04.68	l	58	14.0149	14.5663	13.7136	14.051	26.3027	27.906	16.8005	12.8663	15.0068	16.2031
MMC	2000.04.69	l	58	14.0149	14.5663	13.7136	14.051	26.3027	27.906	16.8005	12.8663	15.0068	16.2031
MMC	2000.04.7	l	55	12.3264	12.8113	12.0548	12.3514	22.4929	23.864	14.7405	11.4062	13.2136	14.2669
MMC	2000.04.70	l	58	14.0149	14.5663	13.7136	14.051	26.3027	27.906	16.8005	12.8663	15.0068	16.2031
MMC	2000.04.72	l	52	10.7634	11.1869	10.5203	10.7792	19.0669	20.2291	12.8386	10.0437	11.5519	12.4727
MMC	2000.04.77	l	57	13.4379	13.9666	13.1467	13.4701	24.9889	26.5122	16.0961	12.3687	14.3943	15.5418
MMC	2000.04.78	l	57	13.4379	13.9666	13.1467	13.4701	24.9889	26.5122	16.0961	12.3687	14.3943	15.5418
MMC	2000.04.87	l	57	13.4379	13.9666	13.1467	13.4701	24.9889	26.5122	16.0961	12.3687	14.3943	15.5418
MMC	2000.04.88	l	58	14.0149	14.5663	13.7136	14.051	26.3027	27.906	16.8005	12.8663	15.0068	16.2031
MMC	2000.04.89	l	55	12.3264	12.8113	12.0548	12.3514	22.4929	23.864	14.7405	11.4062	13.2136	14.2669
MMC	2000.04.9	l	62	16.4666	17.1145	16.1236	16.5202	32.0135	33.9649	19.7998	14.9673	17.6072	19.0108
MMC	2000.04.92	l	59	14.6062	15.1808	14.2947	14.6463	27.6613	29.3475	17.523	13.375	15.6343	16.8806
MMC	2000.04.93	l	54	11.7916	12.2555	11.5297	11.8133	21.3093	22.6082	14.0892	10.9413	12.6452	13.6532
NHM	A1346LX	l	60	15.2118	15.8103	14.8899	15.2562	29.0655	30.8372	18.2636	13.8946	16.2768	17.5743
NHM	A1577L	l	57	13.4379	13.9666	13.1467	13.4701	24.9889	26.5122	16.0961	12.3687	14.3943	15.5418
NHM	A1801	l	54	11.7916	12.2555	11.5297	11.8133	21.3093	22.6082	14.0892	10.9413	12.6452	13.6532
NHM	A3379L	l	56	12.8751	13.3816	12.5938	12.9036	23.7193	25.1651	15.4094	11.882	13.7966	14.8964
NHM	A3625	l	56	12.8751	13.3816	12.5938	12.9036	23.7193	25.1651	15.4094	11.882	13.7966	14.8964
NHM	A433	l	62	16.4666	17.1145	16.1236	16.5202	32.0135	33.9649	19.7998	14.9673	17.6072	19.0108
NHM	A434	l	63	17.116	17.7894	16.7621	17.1745	33.5587	35.6043	20.5957	15.5205	18.2954	19.7538
NHM	A435	l	59	14.6062	15.1808	14.2947	14.6463	27.6613	29.3475	17.523	13.375	15.6343	16.8806
NHM	A900L	l	59	14.6062	15.1808	14.2947	14.6463	27.6613	29.3475	17.523	13.375	15.6343	16.8806
OC	AG-1270	l	58	14.0149	14.5663	13.7136	14.051	26.3027	27.906	16.8005	12.8663	15.0068	16.2031
OC	AG-4745MAS 2007/006°	l	57	13.4379	13.9666	13.1467	13.4701	24.9889	26.5122	16.0961	12.3687	14.3943	15.5418
OC	AG-482	l	51	10.2699	10.6739	10.0359	10.2828	18.0067	19.1043	12.239	9.61101	11.0267	11.9057
OC	AG-484	l	54	11.7916	12.2555	11.5297	11.8133	21.3093	22.6082	14.0892	10.9413	12.6452	13.6532
NHM	Dodo skeleton (no number)	l	56	12.8751	13.3816	12.5938	12.9036	23.7193	25.1651	15.4094	11.882	13.7966	14.8964
Tring	Dodo skeleton Tring (no number)	l	60	15.2118	15.8103	14.8899	15.2562	29.0655	30.8372	18.2636	13.8946	16.2768	17.5743
OC	MAS 2010/20257	l	54	11.7916	12.2555	11.5297	11.8133	21.3093	22.6082	14.0892	10.9413	12.6452	13.6532
OC	MAS2005/394	l	52	10.7634	11.1869	10.5203	10.7792	19.0669	20.2291	12.8386	10.0437	11.5519	12.4727
OC	MAS2005/395	l	54	11.7916	12.2555	11.5297	11.8133	21.3093	22.6082	14.0892	10.9413	12.6452	13.6532
OC	MAS2005/848	l	54	11.7916	12.2555	11.5297	11.8133	21.3093	22.6082	14.0892	10.9413	12.6452	13.6532
MNHN	mounted dodo (no number)	l	58	14.0149	14.5663	13.7136	14.051	26.3027	27.906	16.8005	12.8663	15.0068	16.2031
NCB.RMNH.Aves	163633(i)	l	53	11.2706	11.714	11.0182	11.2893	20.1675	21.3968	13.4552	10.4872	12.0913	13.0552
UMZC	415.K (2012.055)	l	61	15.8319	16.4548	15.4995	15.8808	30.516	32.3761	19.0225	14.4254	16.9344	18.2843
UMZC	415.K (2012.057)	l	59	14.6062	15.1808	14.2947	14.6463	27.6613	29.3475	17.523	13.375	15.6343	16.8806
UMZC	(2012.059)	l	59	14.6062	15.1808	14.2947	14.6463	27.6613	29.3475	17.523	13.375	15.6343	16.8806
UMZC	(2012.062)	l	55	12.3264	12.8113	12.0548	12.3514	22.4929	23.864	14.7405	11.4062	13.2136	14.2669
UMZC	415.K (2012.063)	l	53	11.2706	11.714	11.0182	11.2893	20.1675	21.3968	13.4552	10.4872	12.0913	13.0552
UMZC	415.K (2012.065)	l	53	11.2706	11.714	11.0182	11.2893	20.1675	21.3968	13.4552	10.4872	12.0913	13.0552
UMZC	415.K (2012.066)	l	59	14.6062	15.1808	14.2947	14.6463	27.6613	29.3475	17.523	13.375	15.6343	16.8806
UMZC	415.K (2012.068)	l	52	10.7634	11.1869	10.5203	10.7792	19.0669	20.2291	12.8386	10.0437	11.5519	12.4727
UMZC	415.K (2012.072)	l	54	11.7916	12.2555	11.5297	11.8133	21.3093	22.6082	14.0892	10.9413	12.6452	13.6532
UMZC	415.K (2012.074)	l	53	11.2706	11.714	11.0182	11.2893	20.1675	21.3968	13.4552	10.4872	12.0913	13.0552
UMZC	415.K (2012.076)	l	56	12.8751	13.3816	12.5938	12.9036	23.7193	25.1651	15.4094	11.882	13.7966	14.8964
UMZC	415.K (2012.077)	l	53	11.2706	11.714	11.0182	11.2893	20.1675	21.3968	13.4552	10.4872	12.0913	13.0552
UMZC	415.K (2012.079)	l	59	14.6062	15.1808	14.2947	14.6463	27.6613	29.3475	17.523	13.375	15.6343	16.8806
UMZC	415.K (2012.080)	l	60	15.2118	15.8103	14.8899	15.2562	29.0655	30.8372	18.2636	13.8946	16.2768	17.5743
UMZC	415.K (2012.081)	l	55	12.3264	12.8113	12.0548	12.3514	22.4929	23.864	14.7405	11.4062	13.2136	14.2669
UMZC	415.K (2012.082)	l	58	14.0149	14.5663	13.7136	14.051	26.3027	27.906	16.8005	12.8663	15.0068	16.2031
UMZC	415.K (2012.084)	l	52	10.7634	11.1869	10.5203	10.7792	19.0669	20.2291	12.8386	10.0437	11.5519	12.4727
UMZC	415.K (2012.085)	l	54	11.7916	12.2555	11.5297	11.8133	21.3093	22.6082	14.0892	10.9413	12.6452	13.6532
UMZC	415.K (2012.086)	l	53	11.2706	11.714	11.0182	11.2893	20.1675	21.3968	13.4552	10.4872	12.0913	13.0552
UMZC	415.K (2012.089)	l	55	12.3264	12.8113	12.0548	12.3514	22.4929	23.864	14.7405	11.4062	13.2136	14.2669
UMZC	415.K (2012.091)	l	52	10.7634	11.1869	10.5203	10.7792	19.0669	20.2291	12.8386	10.0437	11.5519	12.4727
UMZC	415.H (2012.096)	l	57	13.4379	13.9666	13.1467	13.4701	24.9889	26.5122	16.0961	12.3687	14.3943	15.5418
	1840	r	63	17.116	17.7894	16.7621	17.1745	33.5587	35.6043	20.5957	15.5205	18.2954	19.7538
MMC	2000.04.1	r	57	13.4379	13.9666	13.1467	13.4701	24.9889	26.5122	16.0961	12.3687	14.3943	15.5418
MMC	2000.04.10	r	61	15.8319	16.4548	15.4995	15.8808	30.516	32.3761	19.0225	14.4254	16.9344	18.2843
MMC	2000.04.101	r	59	14.6062	15.1808	14.2947	14.6463	27.6613	29.3475	17.523	13.375	15.6343	16.8806
MMC	2000.04.103	r	58	14.0149	14.5663	13.7136	14.051	26.3027	27.906	16.8005	12.8663	15.0068	16.2031
MMC	2000.04.104	r	52	10.7634	11.1869	10.5203	10.7792	19.0669	20.2291	12.8386	10.0437	11.5519	12.4727
MMC	2000.04.107	r	57	13.4379	13.9666	13.1467	13.4701	24.9889	26.5122	16.0961	12.3687	14.3943	15.5418
MMC	2000.04.108	r	58	14.0149	14.5663	13.7136	14.051	26.3027	27.906	16.8005	12.8663	15.0068	16.2031
MMC	2000.04.111	r	53	11.2706	11.714	11.0182	11.2893	20.1675	21.3968	13.4552	10.4872	12.0913	13.0552
MMC	2000.04.112	r	63	17.116	17.7894	16.7621	17.1745	33.5587	35.6043	20.5957	15.5205	18.2954	19.7538
MMC	2000.04.113	r	56	12.8751	13.3816	12.5938	12.9036	23.7193	25.1651	15.4094	11.882	13.7966	14.8964
MMC	2000.04.116	r	55	12.3264	12.8113	12.0548	12.3514	22.4929	23.864	14.7405	11.4062	13.2136	14.2669
MMC	2000.04.120	r	58	14.0149	14.5663	13.7136	14.051	26.3027	27.906	16.8005	12.8663	15.0068	16.2031
MMC	2000.04.17	r	64	17.7801	18.4796	17.4153	17.8438	35.1524	37.2952	21.4102	16.0848	18.999	20.5135
MMC	2000.04.18	r	58	14.0149	14.5663	13.7136	14.051	26.3027	27.906	16.8005	12.8663	15.0068	16.2031
MMC	2000.04.2	r	59	14.6062	15.1808	14.2947	14.6463	27.6613	29.3475	17.523	13.375	15.6343	16.8806
MMC	2000.04.20	r	58	14.0149	14.5663	13.7136	14.051	26.3027	27.906	16.8005	12.8663	15.0068	16.2031
MMC	2000.04.24	r	59	14.6062	15.1808	14.2947	14.6463	27.6613	29.3475	17.523	13.375	15.6343	16.8806
MMC	2000.04.3	r	62	16.4666	17.1145	16.1236	16.5202	32.0135	33.9649	19.7998	14.9673	17.6072	19.0108
MMC	2000.04.31	r	58	14.0149	14.5663	13.7136	14.051	26.3027	27.906	16.8005	12.8663	15.0068	16.2031
MMC	2000.04.34	r	58	14.0149	14.5663	13.7136	14.051	26.3027	27.906	16.8005	12.8663	15.0068	16.2031
MMC	2000.04.39	r	55	12.3264	12.8113	12.0548	12.3514	22.4929	23.864	14.7405	11.4062	13.2136	14.2669
MMC	2000.04.4	r	65	18.4592	19.1854	18.0833	18.5281	36.7953	39.0383	22.2436	16.6605	19.7181	21.2899
MMC	2000.04.43	r	59	14.6062	15.1808	14.2947	14.6463	27.6613	29.3475	17.523	13.375	15.6343	16.8806
MMC	2000.04.49	r	63	17.116	17.7894	16.7621	17.1745	33.5587	35.6043	20.5957	15.5205	18.2954	19.7538
MMC	2000.04.5	r	60	15.2118	15.8103	14.8899	15.2562	29.0655	30.8372	18.2636	13.8946	16.2768	17.5743
MMC	2000.04.50	r	60	15.2118	15.8103	14.8899	15.2562	29.0655	30.8372	18.2636	13.8946	16.2768	17.5743
MMC	2000.04.52	r	65	18.4592	19.1854	18.0833	18.5281	36.7953	39.0383	22.2436	16.6605	19.7181	21.2899
MMC	2000.04.53	r	57	13.4379	13.9666	13.1467	13.4701	24.9889	26.5122	16.0961	12.3687	14.3943	15.5418
MMC	2000.04.54	r	57	13.4379	13.9666	13.1467	13.4701	24.9889	26.5122	16.0961	12.3687	14.3943	15.5418
MMC	2000.04.55	r	61	15.8319	16.4548	15.4995	15.8808	30.516	32.3761	19.0225	14.4254	16.9344	18.2843
MMC	2000.04.58	r	58	14.0149	14.5663	13.7136	14.051	26.3027	27.906	16.8005	12.8663	15.0068	16.2031
MMC	2000.04.60	r	57	13.4379	13.9666	13.1467	13.4701	24.9889	26.5122	16.0961	12.3687	14.3943	15.5418
MMC	2000.04.61	r	58	14.0149	14.5663	13.7136	14.051	26.3027	27.906	16.8005	12.8663	15.0068	16.2031
MMC	2000.04.62	r	55	12.3264	12.8113	12.0548	12.3514	22.4929	23.864	14.7405	11.4062	13.2136	14.2669
MMC	2000.04.63	r	59	14.6062	15.1808	14.2947	14.6463	27.6613	29.3475	17.523	13.375	15.6343	16.8806
MMC	2000.04.64	r	58	14.0149	14.5663	13.7136	14.051	26.3027	27.906	16.8005	12.8663	15.0068	16.2031
MMC	2000.04.75	r	58	14.0149	14.5663	13.7136	14.051	26.3027	27.906	16.8005	12.8663	15.0068	16.2031
MMC	2000.04.8	r	58	14.0149	14.5663	13.7136	14.051	26.3027	27.906	16.8005	12.8663	15.0068	16.2031
MMC	2000.04.81	r	57	13.4379	13.9666	13.1467	13.4701	24.9889	26.5122	16.0961	12.3687	14.3943	15.5418
MMC	2000.04.82	r	56	12.8751	13.3816	12.5938	12.9036	23.7193	25.1651	15.4094	11.882	13.7966	14.8964
MMC	2000.04.83	r	59	14.6062	15.1808	14.2947	14.6463	27.6613	29.3475	17.523	13.375	15.6343	16.8806
MMC	2000.04.90	r	58	14.0149	14.5663	13.7136	14.051	26.3027	27.906	16.8005	12.8663	15.0068	16.2031
MMC	2000.04.91	r	56	12.8751	13.3816	12.5938	12.9036	23.7193	25.1651	15.4094	11.882	13.7966	14.8964
NHM	A1346R	r	53	11.2706	11.714	11.0182	11.2893	20.1675	21.3968	13.4552	10.4872	12.0913	13.0552
NHM	A1346RX	r	59	14.6062	15.1808	14.2947	14.6463	27.6613	29.3475	17.523	13.375	15.6343	16.8806
NHM	A1577R	r	55	12.3264	12.8113	12.0548	12.3514	22.4929	23.864	14.7405	11.4062	13.2136	14.2669
NHM	A3379R	r	53	11.2706	11.714	11.0182	11.2893	20.1675	21.3968	13.4552	10.4872	12.0913	13.0552
NHM	A3626	r	57	13.4379	13.9666	13.1467	13.4701	24.9889	26.5122	16.0961	12.3687	14.3943	15.5418
NHM	A436	r	58	14.0149	14.5663	13.7136	14.051	26.3027	27.906	16.8005	12.8663	15.0068	16.2031
NHM	A437	r	60	15.2118	15.8103	14.8899	15.2562	29.0655	30.8372	18.2636	13.8946	16.2768	17.5743
NHM	A72f	r	58	14.0149	14.5663	13.7136	14.051	26.3027	27.906	16.8005	12.8663	15.0068	16.2031
NHM	A900R	r	59	14.6062	15.1808	14.2947	14.6463	27.6613	29.3475	17.523	13.375	15.6343	16.8806
OC	AG-125(MAS 2006/1042)	r	54	11.7916	12.2555	11.5297	11.8133	21.3093	22.6082	14.0892	10.9413	12.6452	13.6532
OC	AG-478	r	57	13.4379	13.9666	13.1467	13.4701	24.9889	26.5122	16.0961	12.3687	14.3943	15.5418
OC	AG-921	r	52	10.7634	11.1869	10.5203	10.7792	19.0669	20.2291	12.8386	10.0437	11.5519	12.4727
OC	AG-96	r	66	19.1531	19.9067	18.766	19.2277	38.4882	40.8343	23.096	17.2475	20.4528	22.0832
NHM	Dodo skeleton (no number)	r	62	16.4666	17.1145	16.1236	16.5202	32.0135	33.9649	19.7998	14.9673	17.6072	19.0108
Tring	Dodo skeleton Tring (no number)	r	59	14.6062	15.1808	14.2947	14.6463	27.6613	29.3475	17.523	13.375	15.6343	16.8806
OC	MAS 2006/680	r	54	11.7916	12.2555	11.5297	11.8133	21.3093	22.6082	14.0892	10.9413	12.6452	13.6532
OC	MAS 2010/20255	r	54	11.7916	12.2555	11.5297	11.8133	21.3093	22.6082	14.0892	10.9413	12.6452	13.6532
MNHN	mounted dodo (no number)	r	59	14.6062	15.1808	14.2947	14.6463	27.6613	29.3475	17.523	13.375	15.6343	16.8806
MNHN	mounted leg (no number)	r	48	8.86992	9.21888	8.66254	8.87565	15.0614	15.9795	10.5414	8.37636	9.53578	10.2959
NCB.RMNH.Aves	163777(k)	r	56	12.8751	13.3816	12.5938	12.9036	23.7193	25.1651	15.4094	11.882	13.7966	14.8964
UMZC	415.K (2012.054)	r	54	11.7916	12.2555	11.5297	11.8133	21.3093	22.6082	14.0892	10.9413	12.6452	13.6532
UMZC	415.K (2012.056)	r	57	13.4379	13.9666	13.1467	13.4701	24.9889	26.5122	16.0961	12.3687	14.3943	15.5418
UMZC	415.K (2012.058)	r	60	15.2118	15.8103	14.8899	15.2562	29.0655	30.8372	18.2636	13.8946	16.2768	17.5743
UMZC	415.K (2012.060)	r	59	14.6062	15.1808	14.2947	14.6463	27.6613	29.3475	17.523	13.375	15.6343	16.8806
UMZC	415.K (2012.061)	r	54	11.7916	12.2555	11.5297	11.8133	21.3093	22.6082	14.0892	10.9413	12.6452	13.6532
UMZC	415.K (2012.064)	r	60	15.2118	15.8103	14.8899	15.2562	29.0655	30.8372	18.2636	13.8946	16.2768	17.5743
UMZC	415.K (2012.067)	r	53	11.2706	11.714	11.0182	11.2893	20.1675	21.3968	13.4552	10.4872	12.0913	13.0552
UMZC	415.K (2012.069)	r	56	12.8751	13.3816	12.5938	12.9036	23.7193	25.1651	15.4094	11.882	13.7966	14.8964
UMZC	415.K (2012.070)	r	53	11.2706	11.714	11.0182	11.2893	20.1675	21.3968	13.4552	10.4872	12.0913	13.0552
UMZC	415.K (2012.071)	r	53	11.2706	11.714	11.0182	11.2893	20.1675	21.3968	13.4552	10.4872	12.0913	13.0552
UMZC	415.K (2012.073)	r	59	14.6062	15.1808	14.2947	14.6463	27.6613	29.3475	17.523	13.375	15.6343	16.8806
UMZC	415.K (2012.075)	r	54	11.7916	12.2555	11.5297	11.8133	21.3093	22.6082	14.0892	10.9413	12.6452	13.6532
UMZC	415.K (2012.078)	r	58	14.0149	14.5663	13.7136	14.051	26.3027	27.906	16.8005	12.8663	15.0068	16.2031
UMZC	415.K (2012.083)	r	53	11.2706	11.714	11.0182	11.2893	20.1675	21.3968	13.4552	10.4872	12.0913	13.0552
UMZC	415.K (2012.087)	r	53	11.2706	11.714	11.0182	11.2893	20.1675	21.3968	13.4552	10.4872	12.0913	13.0552
UMZC	415.K (2012.088)	r	52	10.7634	11.1869	10.5203	10.7792	19.0669	20.2291	12.8386	10.0437	11.5519	12.4727
UMZC	415.K (2012.090)	r	57	13.4379	13.9666	13.1467	13.4701	24.9889	26.5122	16.0961	12.3687	14.3943	15.5418
UMZC	415.K (2012.095)	r	58	14.0149	14.5663	13.7136	14.051	26.3027	27.906	16.8005	12.8663	15.0068	16.2031

## Sheet: legend
Abbreviations	Explanations
NHM	Natural History Museum London
MMC	Mauritius Museums Council
OC	OmniCane
Tring	Natural History Museum at Tring
MNHN	Muséum national d'Histoire naturelle
NCB.RMNH.Aves	Nederlands Centrum voor Biodiversiteit Naturalis, Rijksmuseum van Natuurlijke Historie Leiden, Bird Division
UMZC	University Museum of Zoology Cambridge
M_C	mid-shaft circumference in milimeters
l	left
r	right
own.naive	estimated body mass in kilograms based on the data presented here (supplementary info 2)
own.smear	estimated body mass in kilograms based on the data presented here (supplementary info 2) with a smearing correction
own.wo.columbids.naive	estimated body mass in kilograms based on the data presented here (supplementary info 2) using medium-sized ground-dwelling birds and flightless birds only (i.e., without columbids)
own.wo.columbids.smear	estimated body mass in kilograms based on the data presented here (supplementary info 2) using medium-sized ground-dwelling birds and flightless birds only (i.e., without columbids) with a smearing correction
own.naive.flightless	estimated body mass in kilograms based on the data presented here (supplementary info 2) using flightless birds only (i.e., without columbids)
own.naive.flightless.ratio	estimated body mass in kilograms based on the data presented here (supplementary info 2) using flightless birds only (i.e., without columbids) with a corrected using the ratio estimator
CM.all.naive	estimated body mass in kilograms based on the equation for all birds of Campbell and Marcus (1992)
CM.subset.naive	estimated body mass in kilograms based on the equation for heavy bodied (semi-)terrestrial birds of Campbell and Marcus (1992)
Field.all.naive	estimated body mass in kilograms based on the equation for all birds of Field et al. (2013)
Field.all.smear	estimated body mass in kilograms based on the equation for all birds of Field et al. (2013) with a smearing correction (see supplementary information 2)
Notes
The specimens at the University Museum of Zoology Cambridge are almost all catalogued under the number 415.K. The numbers between brackets are IDs given by AHvH.
