# Supplementary material for: Neither slim nor fat: estimating the mass of the dodo (Raphus cucullatus, Aves, Columbiformes) based on the largest sample of dodo bones to date
Source: PeerJ. 2017 Dec 5;5:e4110. doi: 10.7717/peerj.4110 (PMC5721909; doi:10.7717/peerj.4110)
Supplement: Supplemental Information 2 — Raw circumference measurements on the modern birds. Details on abbreviations can be found in the “legend” tab. [file peerj-05-4110-s002.xlsx]

## Sheet: Supplementary Information 2
Institution Code	Catalogue Number	Order	Family	Genus	species	Category	sex	side	M_C	mass(g)	mass literature source
NCB.RMNH.Aves	b	Columbiformes	Columbidae	Goura	cristata	Columbidae	f	l	20.9	2100	Gibbs
NCB.RMNH.Aves	b	Columbiformes	Columbidae	Goura	cristata	Columbidae	f	r	23.8	2100	Gibbs
NCB.ZMA.Aves/NCB.RMNH.Aves	39033/c/d/39053	Columbiformes	Columbidae	Goura	cristata	Columbidae	f	l	23	2100	Gibbs
NCB.ZMA.Aves/NCB.RMNH.Aves	39033/c/d/39053	Columbiformes	Columbidae	Goura	cristata	Columbidae	f	r	26.9	2100	Gibbs
NCB.RMNH.Aves	6569	Columbiformes	Columbidae	Goura	cristata	Columbidae	f	r	24.8	2100	Gibbs
NCB.RMNH.Aves	a	Columbiformes	Columbidae	Goura	cristata	Columbidae	m	l	25	2100	Gibbs
NCB.RMNH.Aves	a	Columbiformes	Columbidae	Goura	victoria	Columbidae	m	l	23.8	2384	Gibbs
NCB.RMNH.Aves	a	Columbiformes	Columbidae	Goura	victoria	Columbidae	m	r	21.7	2384	Gibbs
NCB.RMNH.Aves	2620	Columbiformes	Columbidae	Goura	scheepmakeri	Columbidae	f	r	23.9	2250	Gibbs
NCB.RMNH.Aves	a	Columbiformes	Columbidae	Didunculus	strigirostris	Columbidae	m	r	11.9	400	Del Hoyo Vol. 4
NCB.RMNH.Aves	b	Columbiformes	Columbidae	Didunculus	strigirostris	Columbidae	f	l	16.4	400	Del Hoyo Vol. 4
NCB.RMNH.Aves	c	Columbiformes	Columbidae	Didunculus	strigirostris	Columbidae	m	l	14.5	400	Del Hoyo Vol. 4
NCB.RMNH.Aves	a	Columbiformes	Columbidae	Caloenas	nicobarica	Columbidae	m	l	19	495	Del Hoyo Vol. 4
NCB.RMNH.Aves	a	Columbiformes	Columbidae	Caloenas	nicobarica	Columbidae	m	r	18	495	Del Hoyo Vol. 4
NCB.RMNH.Aves	b	Columbiformes	Columbidae	Caloenas	nicobarica	Columbidae	m	l	13.8	495	Del Hoyo Vol. 4
NCB.RMNH.Aves	83262	Columbiformes	Columbidae	Caloenas	nicobarica	Columbidae	m	l	16.5	495	Del Hoyo Vol. 4
NCB.RMNH.Aves	106022	Apterygiformes	Apterygidae	Apterix	australis	Flightless	f	l	31.5	2500	Marchant & Higgens Vol. 1a
NCB.RMNH.Aves	106022	Apterygiformes	Apterygidae	Apterix	australis	Flightless	f	r	32	2500	Marchant & Higgens Vol. 1a
NCB.ZMA.Aves	38302	Apterygiformes	Apterygidae	Apterix	mantelli	Flightless	f	l	31.5	2500	Marchant & Higgens Vol. 1b
NCB.ZMA.Aves	38302	Apterygiformes	Apterygidae	Apterix	mantelli	Flightless	f	r	31.5	2500	Marchant & Higgens Vol. 1b
NCB.RMNH.Aves	53470/35308	Casuariiformes	Casuariidae	Casuaris	unappendiculatus	Flightless	m	l	91	31500	Del Hoyo Vol. 1
NCB.RMNH.Aves	53470/35308	Casuariiformes	Casuariidae	Casuaris	unappendiculatus	Flightless	m	r	93	31500	Del Hoyo Vol. 1
NCB.RMNH.Aves	53470/35308	Casuariiformes	Casuariidae	Casuaris	unappendiculatus	Flightless	m	l	81	31500	Del Hoyo Vol. 1
NCB.RMNH.Aves	53470/35308	Casuariiformes	Casuariidae	Casuaris	unappendiculatus	Flightless	m	r	83	31500	Del Hoyo Vol. 1
NCB.ZMA.Aves	36336/36337/38301	Casuariiformes	Dromaiidae	Dromaius	novaehollandiae	Flightless	m/f	l	94	35500	Marchant & Higgins
NCB.ZMA.Aves	36336/36337/38301	Casuariiformes	Dromaiidae	Dromaius	novaehollandiae	Flightless	m/f	r	91	35500	Marchant & Higgins
NCB.ZMA.Aves	36336/36337/38301	Casuariiformes	Dromaiidae	Dromaius	novaehollandiae	Flightless	m/f	l	89	35500	Marchant & Higgins
NCB.ZMA.Aves	36336/36337/38301	Casuariiformes	Dromaiidae	Dromaius	novaehollandiae	Flightless	m/f	r	89	35500	Marchant & Higgins
NCB.RMNH.Aves	2345/5477	Struthioniformes	Struthionidae	Struthio	camelus	Flightless	f	l	114	100000	Del Hoyo Vol.1
NCB.RMNH.Aves	2345/5477	Struthioniformes	Struthionidae	Struthio	camelus	Flightless	f	r	115	100000	Del Hoyo Vol.1
NCB.RMNH.Aves	106003	Struthioniformes	Struthionidae	Struthio	molybdopanes	Flightless	m	l	133	128000	Del Hoyo Vol.1
NCB.RMNH.Aves	106003	Struthioniformes	Struthionidae	Struthio	molybdopanes	Flightless	m	r	135	128000	Del Hoyo Vol.1
NCB.RMNH.Aves	4320/4084/4683	Rheiformes	Rheidae	Rhea	americana	Flightless	m	l	74	25000	Del Hoyo Vol.1
NCB.RMNH.Aves	4320/4084/4683	Rheiformes	Rheidae	Rhea	americana	Flightless	m	r	73	25000	Del Hoyo Vol.1
NCB.RMNH.Aves	c	Galliformes	Phasianidae	Meleagris	gallopavo	medium-sized ground-dwelling	m	l	31.4	4000	Del Hoyo Vol.1
NCB.RMNH.Aves	c	Galliformes	Phasianidae	Meleagris	gallopavo	medium-sized ground-dwelling	m	r	32.5	4000	Del Hoyo Vol.1
NCB.RMNH.Aves	a	Galliformes	Phasianidae	Phasianus	colchicus	medium-sized ground-dwelling	m	l	21.8	1380	Del Hoyo Vol.3
NCB.RMNH.Aves	a	Galliformes	Phasianidae	Phasianus	colchicus	medium-sized ground-dwelling	m	r	22.1	1380	Del Hoyo Vol.3
NCB.RMNH.Aves/NCB.ZMA.Aves	5997/38944/38945	Galliformes	Megapodiidae	Macrocephalon	maleo	medium-sized ground-dwelling	m	l	24.4	1650	Del Hoyo Vol.3
NCB.RMNH.Aves/NCB.ZMA.Aves	5997/38944/38945	Galliformes	Megapodiidae	Macrocephalon	maleo	medium-sized ground-dwelling	m	r	23.5	1650	Del Hoyo Vol.3
NCB.RMNH.Aves	5965	Galliformes	Megapodiidae	Macrocephalon	maleo	medium-sized ground-dwelling	f	l	19.4	1650	Del Hoyo Vol.3
NCB.RMNH.Aves	5965	Galliformes	Megapodiidae	Macrocephalon	maleo	medium-sized ground-dwelling	f	r	25	1650	Del Hoyo Vol.3
NCB.RMNH.Aves	a	Galliformes	Phasianidae	Tetrao	urogallus	medium-sized ground-dwelling	m	r	30.1	4100	Del Hoyo Vol.3
NCB.RMNH.Aves	f	Galliformes	Phasianidae	Pavo	cristatus	medium-sized ground-dwelling	m	l	39.1	5000	Del Hoyo Vol.3
NCB.RMNH.Aves	f	Galliformes	Phasianidae	Pavo	cristatus	medium-sized ground-dwelling	m	r	38.4	5000	Del Hoyo Vol.3
NCB.RMNH.Aves/NCB.ZMA.Aves	106016/37436/37441/37445	Tinamiformes	Tinamidae	Eudromia	elegans	medium-sized ground-dwelling	m/f	l	16.2	510	Del Hoyo Vol.3
NCB.RMNH.Aves/NCB.ZMA.Aves	106016/37436/37441/37445	Tinamiformes	Tinamidae	Eudromia	elegans	medium-sized ground-dwelling	m/f	r	15.5	510	Del Hoyo Vol.3
NCB.RMNH.Aves/NCB.ZMA.Aves	106016/37436/37441/37445	Tinamiformes	Tinamidae	Eudromia	elegans	medium-sized ground-dwelling	m/f	l	17.5	510	Del Hoyo Vol.3
NCB.RMNH.Aves/NCB.ZMA.Aves	106016/37436/37441/37445	Tinamiformes	Tinamidae	Eudromia	elegans	medium-sized ground-dwelling	m/f	r	16.1	510	Del Hoyo Vol.3
NCB.ZMA.Aves/NCB.RMNH.Aves	38932/c	Galliformes	Phasianidae	Lophura	ignita	medium-sized ground-dwelling	m	l	29.5	2200	Del Hoyo Vol.3
NCB.ZMA.Aves/NCB.RMNH.Aves	38932/c	Galliformes	Phasianidae	Lophura	ignita	medium-sized ground-dwelling	m	r	27.1	2200	Del Hoyo Vol.3
NCB.RMNH.Aves/NCB.ZMA.Aves	106012/52754	Tinamiformes	Tinamidae	Crypturellus	obsoletus	medium-sized ground-dwelling	f	l	12.7	450	Del Hoyo Vol.3
NCB.RMNH.Aves/NCB.ZMA.Aves	106012/52754	Tinamiformes	Tinamidae	Crypturellus	obsoletus	medium-sized ground-dwelling	f	r	12.7	450	Del Hoyo Vol.3

## Sheet: legend
Abbreviations	Explanations
M_C	mid-shaft circumference in milimeters
l	left
r	right
m	male
f	female
NCB	Nederlands Centrum voor Biodiversiteit Naturalis
RMNH	Rijksmuseum van Natuurlijke History, Leiden
ZMA	Zoölogisch Museum Amsterdam
References
Del Hoyo, J., Elliot, A. & Sargatal, J., 1992. Handbook of the Birds of the World Volume 1: Ostrich to Ducks, Lynx Edicions.
Del Hoyo, J., Elliot, A. & Sargatal, J., 1996. Handbook of the Birds of the World Volume 3: Hoatzin to Auks, Lynx Edicions.
Del Hoyo, J., Elliot, A. & Sargatal, J., 1997. Handbook of the Birds of the World Volume 4: Sandgroose to Cuckoos, Lynx Edicions.
Gibbs, D., Barnes, E., & Cox, J., 2001. Pigeons and doves: a guide to the pigeons and doves of the world (Vol. 13), Pika Press, Sussex.
Marchant, S. & Higgins, P.J., 1990. Handbook of Australian, New Zealand and Antarctic Birds Volume 1: Ratites to Ducks, Oxford University Press, Melbourne.
